# Supplementary material
Source: PubMed Central journal article supplement (PMC6592817)
Supplement: EMS83462-supplement-Supplementary_material.pdf [file EMS83462-supplement-Supplementary_material.pdf]

## **Electronic supplementary material**

J Mol Med 2015

### **Kidney Injury is Independent of Endothelial HIF-1 $\alpha$**

Joanna Kalucka<sup>1\*</sup>, Gunnar Schley<sup>1\*</sup>, Adela Georgescu<sup>1</sup>, Bernd Klanke<sup>1</sup>,  
Susanne Rössler<sup>1</sup>, Jasmin Baumgartl<sup>1</sup>, Joachim Velden<sup>2</sup>, Kerstin Amann<sup>2</sup>,  
Carsten Willam<sup>1</sup>, Randall S. Johnson<sup>3</sup>, Kai-Uwe Eckardt<sup>1#</sup> and Alexander  
Weidemann<sup>1</sup>

# to whom correspondence should be addressed:

Prof. Dr. Kai-Uwe Eckardt

Department of Nephrology and Hypertension

Universitätsklinikum Erlangen

Friedrich-Alexander-Universität Erlangen-Nürnberg

Ulmenweg 18

91054 Erlangen

E-Mail: kai-uwe.eckardt@uk-erlangen.de

**Supplemental Table 1**

| <b>Primer Name</b>        | <b>Sequence</b>                   |
|---------------------------|-----------------------------------|
| HIF1 F1 (Deletion)        | TTGGGGATGAAAACATCTGC              |
| HIF1 F2 (Deletion)        | GCAGTTAAGAGCACTAGTTG              |
| HIF1 R (Deletion)         | GGAGCTATCTCTCTAGACC               |
| HIF-1alpha F (Genotyping) | GCAGTTAAGAGCACTAGTTG              |
| HIF-1alpha R (Genotyping) | GGAGCTATCTCTCTAGACC               |
| Tie2-Cre F (Genotyping)   | CCC TGT GCT CAG ACA GAA ATG AGA   |
| Tie2-Cre R (Genotyping)   | CGC ATA ACC AGT GAA ACA GCA TTG C |

**Supplemental Table 2**

| <b>Primer Name</b> | <b>Sequence</b>         |
|--------------------|-------------------------|
| Glut-1 F           | GGGCATGTGCTTCCAGTATGT   |
| Glut-1 R           | ACGAGGAGCACCGTGAAGAT    |
| ICAM F             | CCGCAGGTCCAATTCACACT    |
| ICAM R             | CAGAGCGGCAGAGCAAAAG     |
| VCAM F             | CTCCCCTGAATACAAAACGATTG |
| VCAM R             | GCCCGTAGTGCTGCAAGTG     |
| Col1a2 F           | GTAACACCCCAGCGAAGAACT   |
| Col1a2 R           | TCAAACCTGGCTGCCACCAT    |
| 18s F              | CGGACAGGATTGACAGATTG    |
| 18s R              | CAAATCGCTCCACCAACTAA    |
| TGF $\beta$ F      | GAAACGGAAGCGCATCGA      |
| TGF $\beta$ R      | GGGACTGGCGAGCCTTAGTT    |
| TNF $\alpha$ F     | CTAGTGGTGCCAGCCGATG     |
| TNF $\alpha$ R     | TAGTCGGGGCAGCCTTGTC     |
| PGK F              | CAGGACCATTCCAAACAATCTG  |
| PGK R              | CTGTGGTACTGAGAGCAGCAAGA |
| Ngal F             | GGCCTCAAGGACGACAACA     |
| Ngal R             | TCACCACCCATTTCAGTTGTCA  |
| SMA F              | ATGGCATCAATCACTTCAACAGA |
| SMA R              | ACGCTCTCAAATACCCCGTTT   |

# Supplemental Fig. 1

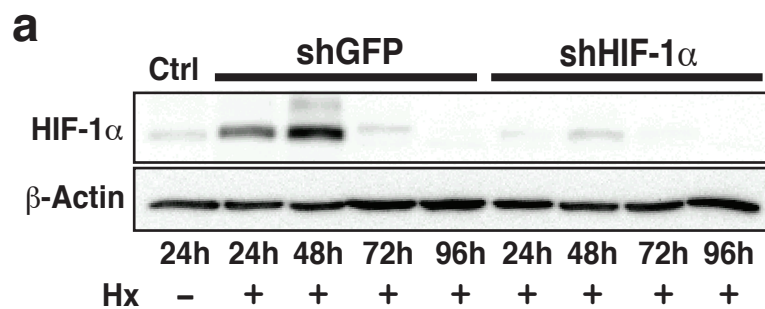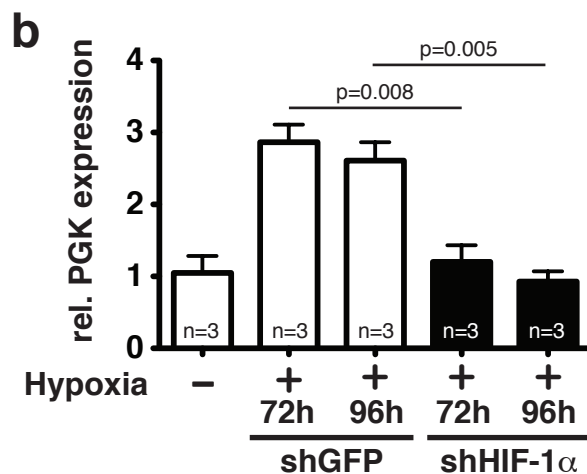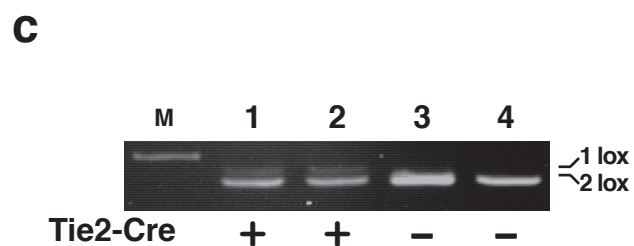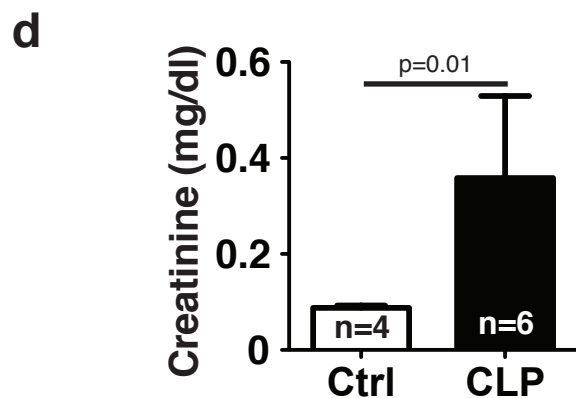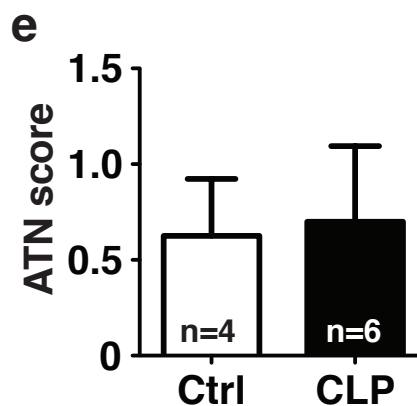

**Supplemental Figure 1** Successful deletion of HIF-1 $\alpha$  in a glomerular endothelial cell line (gIEND.2) and *in vivo* **(a)** Western blot of HIF-1 $\alpha$  in control (shGFP) and shHIF-1 $\alpha$  cells shows successful deletion of HIF-1 $\alpha$  protein. Note the negative feedback loop reducing HIF-1 $\alpha$  protein in control cells after prolonged hypoxia. **(b)** Expression of the HIF-1 $\alpha$  target gene PGK is significantly reduced shHIF-1 $\alpha$  gIENDs compared to control cells (n=3). **(c)** DNA deletion of the Hif1a gene in kidneys: PCR-products of kidney DNA of Tie2-cre(+) animals (lane 1&2) show both the recombined 1-lox band and the 2-lox band whereas DNA of cre-negative mice (lane 3&4) exhibit only the 2-lox bands. **(d)** CLP induced sepsis induces acute kidney injury as determined by increased plasma creatinine levels. **(e)** No renal specific pathology such as increased acute tubular necrosis is observed in animals with CLP-induced sepsis (for both CLP experiments: WT: n=4; KO: n=6).

# Suppl. Fig. 2

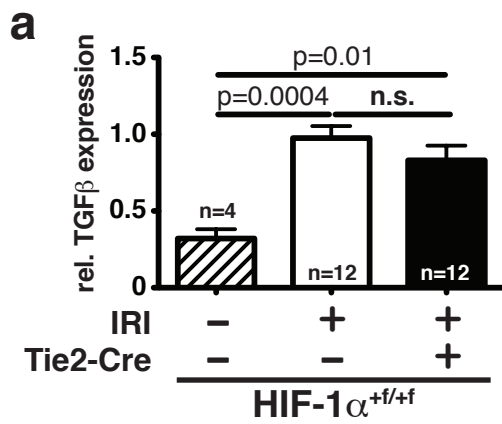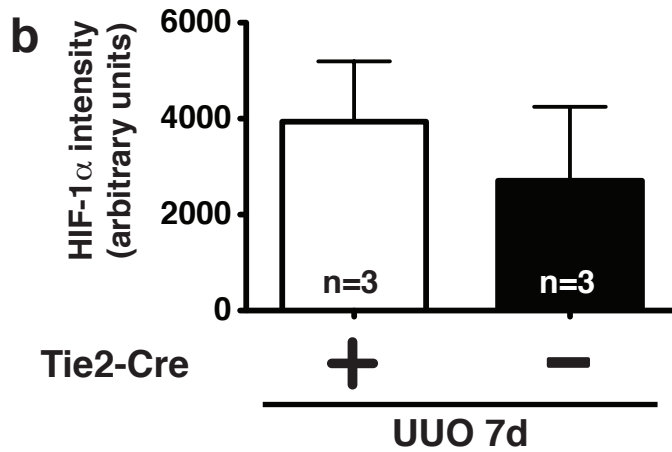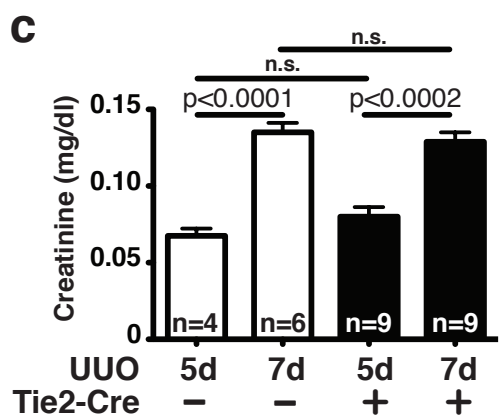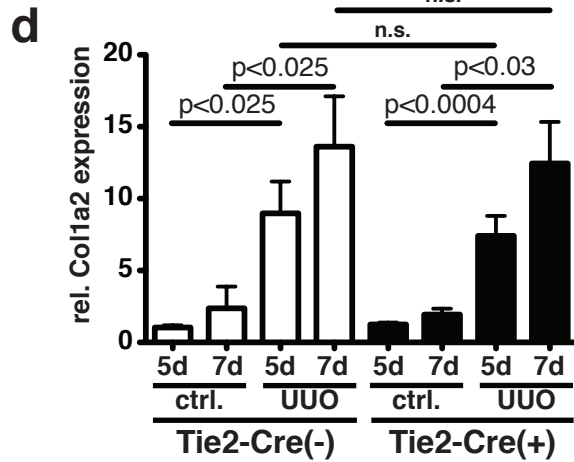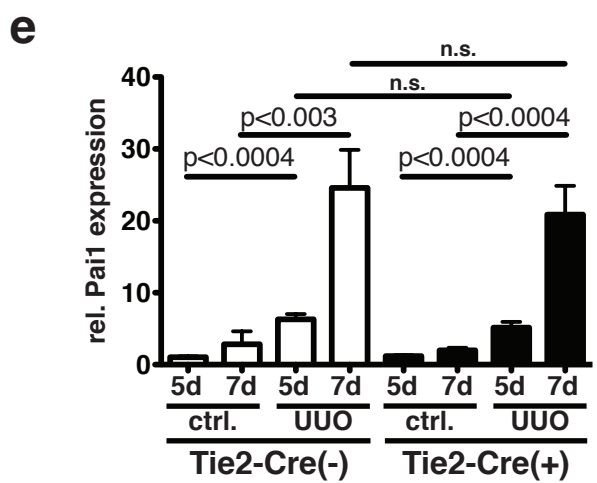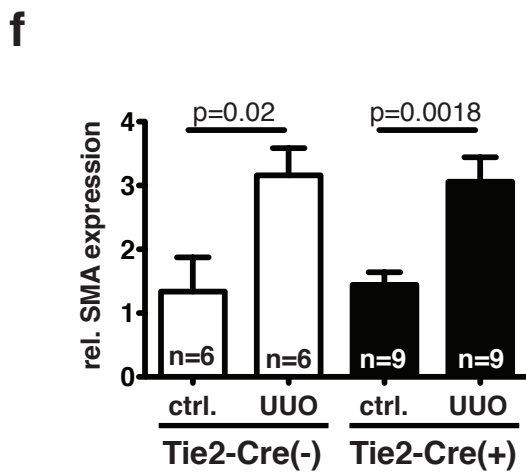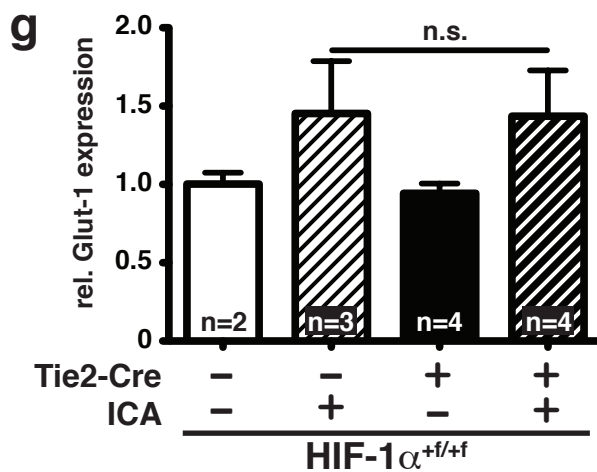

**Supplemental Figure 2: (a)** 72 h after renal IRI TGF $\beta$  mRNA expression in whole kidney lysates is significantly upregulated compared to sham. Loss of HIF-1 $\alpha$  in EC does not affect TGF $\beta$  expression (sham: n=4; IRI n=12). **(b)** A non-significant trend to reduced HIF-1 $\alpha$  protein expression both in tubular cells and EC in HIF-1 $\alpha$  knockout kidneys 7d after obstruction is observed (n=3; 10 random images of each 200x section). **(c)** 7d after UUO renal function is significantly reduced compared to 5d obstruction. Deletion of HIF-1 $\alpha$  in EC does not influence renal function in UUO (WT: n=4-6, KO: n=9). **(d-e)** Fibrosis associated genes Col1a2 and Pai1 are significantly upregulated in obstructed kidneys compared to contralateral (unobstructed) controls. Deletion of endothelial HIF-1 $\alpha$  does not affect expression levels of both genes (all mRNA analyses: WT: n=4-6; KO: n=9). **(f)** mRNA expression of the fibrotic marker  $\alpha$ -smooth muscle actin ( $\alpha$ SMA) is significantly induced 7d after UUO irrespective of HIF-1 $\alpha$  in EC (WT: n=6; KO: n=9). **(g)** Deletion of HIF-1 $\alpha$  in EC does not influence Glut-1 mRNA expression in kidneys after systemic application of the PHD-inhibitor ICA (ICA treated: n=3-4).
